# Supplementary material
Source: publisher figshare collection journal article supplement (https://acs.figshare.com/ndownloader/files/3962032)
Supplement: Supplementary file 1 [file 3962032]

## ***Supporting Information***

# **Electrophoretic Deposition and Characterization of Transparent Nanocomposite Films of $\text{YVO}_4\text{:Bi}^{3+},\text{Eu}^{3+}$ Nanophosphor and Silicone-Modified Acrylic Resin**

Yoshiki Iso, Satoru Takeshita,\* and Tetsuhiko Isobe\*

*Department of Applied Chemistry, Faculty of Science and Technology, Keio University,*

*3-14-1 Hiyoshi, Kohoku-ku, Yokohama 223-8522, Japan*

\*Corresponding authors

Telephone number: +81 45 566 1554

Fax number: +81 45 566 1551

E-mail: takeshita@applc.keio.ac.jp (S. Takeshita), isobe@applc.keio.ac.jp (T. Isobe)

### **Details of preparation procedure of $\text{YVO}_4\text{:Bi}^{3+},\text{Eu}^{3+}$ nanoparticles**

Yttrium acetate tetrahydrate (84.94 mmol) and europium(III) acetate tetrahydrate (53.70 mmol) were dissolved in deionized water (150.00 g). A mixture of deionized water (78.90 g) and sodium citrate dihydrate (53.94 mmol), and a mixture of ethylene glycol (22.50 g) and bismuth(III) nitrate pentahydrate (10.50 mmol) were added to the Y-Eu solution, resulting in a white suspension of a citrate precursor. In another vessel, sodium orthovanadate(V) trihydrate (134.11 mmol) was dissolved in 150.00 g aqueous solution of sodium hydroxide at pH 12.5. Then this solution was added to the white suspension, and the mixture was adjusted to be pH 9.0 by adding an aqueous solution of sodium hydroxide and aged at 85 °C for 1 h. After cooling to room temperature, a paste collected from the aged colloidal solution by centrifugation at 12,000 rpm for 60 min was diluted with deionized water, and then subsequent hydrothermal treatment at 130 °C for 6 h was carried out using an autoclave. After cooling and centrifugation of the resulting colloidal solution at 12,000 rpm for 1 h, the final nanophosphor paste (37.6 wt%) was obtained by washing with deionized water and centrifuging at 12,000 rpm for 1 h twice. TEM image of the nanophosphor is shown in Figure S1.

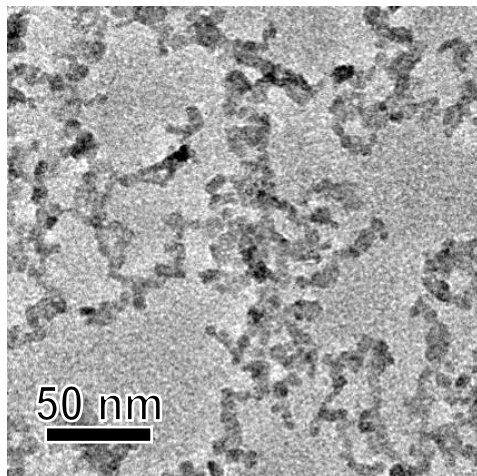

**Figure S1.** TEM image of  $\text{YVO}_4\text{:Bi}^{3+}, \text{Eu}^{3+}$  nanoparticles. The sample was prepared by drying a drop of colloidal solution on a copper microgrid.

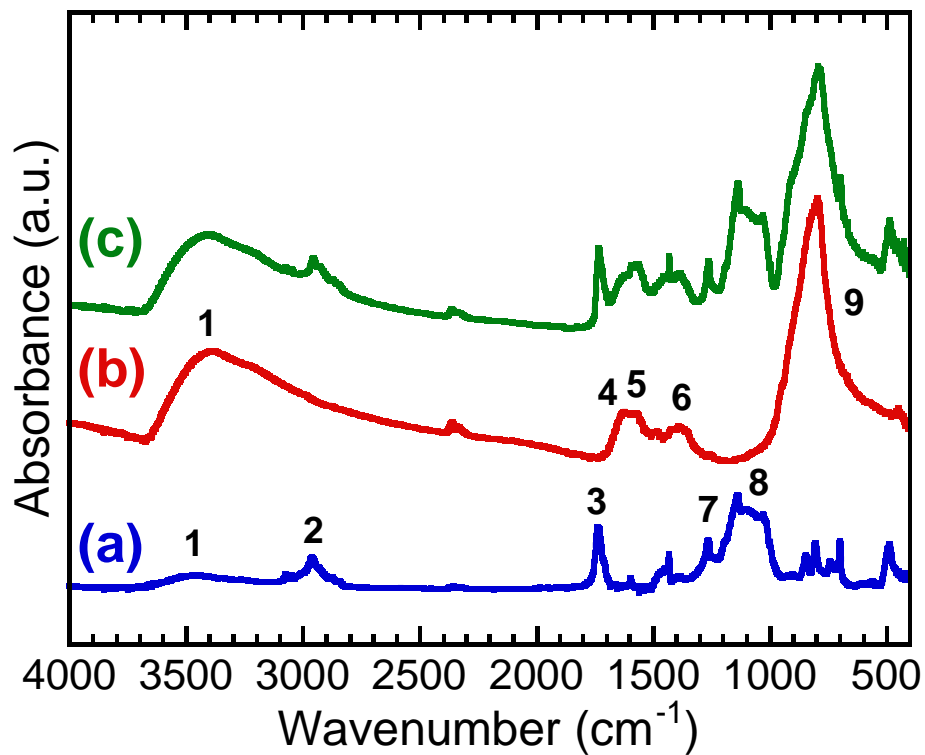

**Figure S2.** FT-IR spectra of (a) silicone-modified acrylic resin film, (b) YVO<sub>4</sub>:Bi<sup>3+</sup>,Eu<sup>3+</sup> nanoparticle film, and (c) nanocomposite film. Deposition time for the films was 5 min. The absorption peaks are assigned in Table S1.

**Table S1.** Assignments of the FT-IR absorption peaks.

| No. | Peak position (cm <sup>-1</sup> ) |                                                      |                    | Assignment                          | Ref. |
|-----|-----------------------------------|------------------------------------------------------|--------------------|-------------------------------------|------|
|     | Resin                             | YVO <sub>4</sub> :Bi <sup>3+</sup> ,Eu <sup>3+</sup> | Nanocomposite film |                                     |      |
| 1   | ~3450                             | ~3400                                                | ~3400              | v(O-H)                              | [S1] |
| 2   | 3100–2800                         |                                                      | 3100–2800          | v(C-H)                              | [S1] |
| 3   | 1736                              |                                                      | 1732               | v(C=O)                              | [S1] |
| 4   |                                   | 1624                                                 | ~1630              | δ(O-H) of H <sub>2</sub> O          | [S1] |
| 5   |                                   | 1577                                                 | 1571               | v <sub>as</sub> (COO <sup>-</sup> ) | [S2] |
| 6   |                                   | 1388                                                 | 1389               | v <sub>s</sub> (COO <sup>-</sup> )  | [S2] |
| 7   | 1263                              |                                                      | 1263               | v(Si-C)                             | [S1] |
| 8   | 1200–1000                         |                                                      | 1200–1000          | v(Si-O)                             | [S1] |
| 9   |                                   | 797                                                  | 790                | v(V-O)                              | [S2] |

v = stretching; δ = deformation

as = asymmetric; s = symmetric

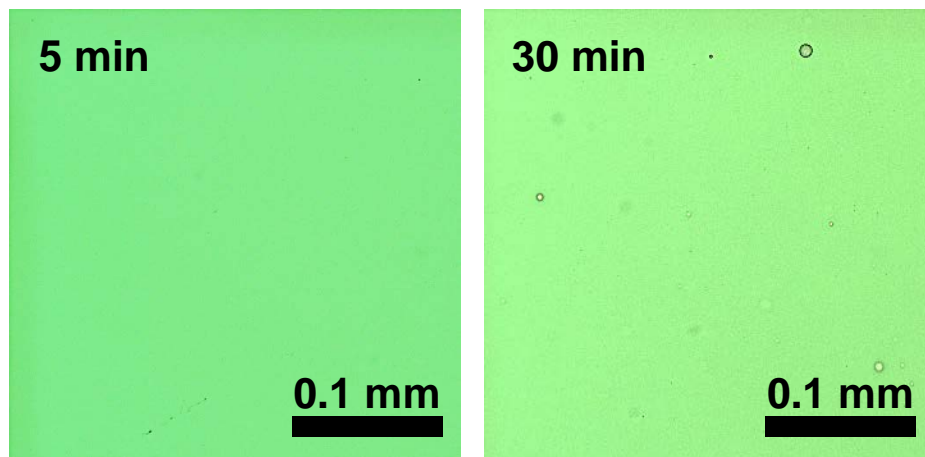

**Figure S3.** Optical microscope images of nanocomposite films deposited for 5 and 30 min. Their thicknesses were 6 and 20  $\mu\text{m}$ , respectively.

## REFERENCES

- (S1) Colthup, N. B.; Daly, L. H.; Wiberley, S. E. *Introduction to Infrared and Raman Spectroscopy 3rd ed.*; Academic Press; New York, 1990; pp 360, 361, 387, 388, 390, 429.
- (S2) Huignard, A.; Buissette, V.; Laurent, G.; Gacoin, T.; Boilot, J. -P. Synthesis and Characterizations of YVO<sub>4</sub>:Eu Colloids. *Chem. Mater.* **2002**, *14*, 2264–2269.
